# Supplementary material for: Human iPSC-Derived Neural Crest Stem Cells Exhibit Low Immunogenicity
Source: PubMed Central journal article supplement — Mol Ther Methods Clin Dev. 2020 Jan 13;16:161–71. doi: 10.1016/j.omtm.2019.12.015 (PMC7005462; doi:10.1016/j.omtm.2019.12.015), 2020-01-13
Supplement: mmc1.pdf [file mmc1.pdf]

**OMTM, Volume 16**

**Supplemental Information**

**Human iPSC-Derived Neural**

**Crest Stem Cells Exhibit**

**Low Immunogenicity**

**Vera J. Mehler, Chris J. Burns, Hans Stauss, Robert J. Francis, and Melanie L. Moore**

# Supplemental data

## MSC differentiation

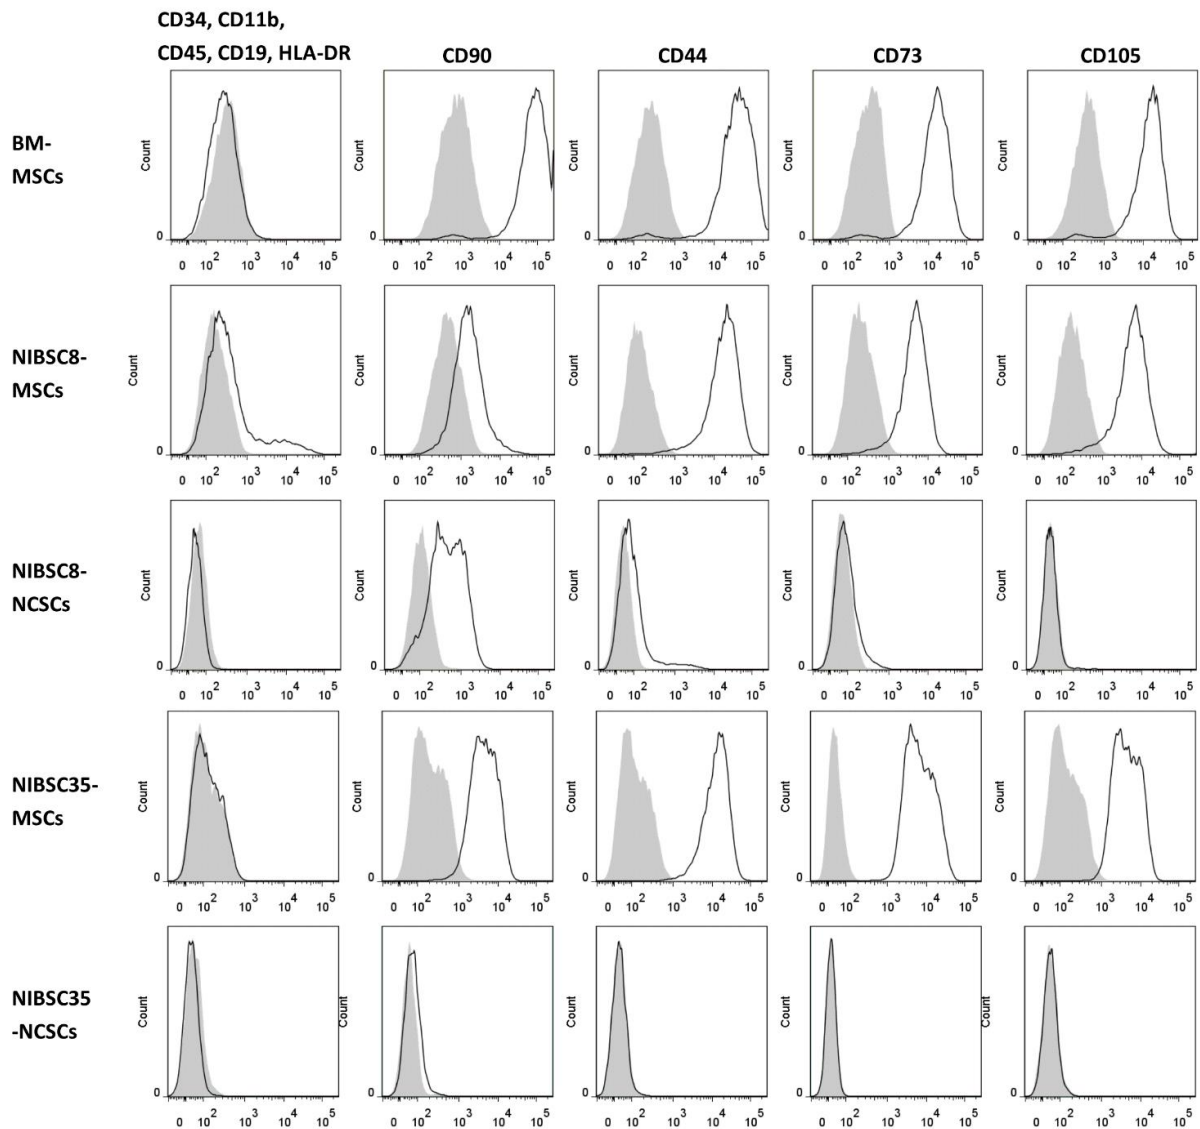

**Figure S1. Characterisation of MSCs differentiated from iPSC-NCSCs.** Representative histograms of % of cells positive for MSC markers, including CD90, CD44, CD73 and CD105 and MSC negative markers, including CD34, CD11b, CD45, CD19 and HLA-DR (black line vs grey shaded isotype control).

## Peripheral nerve differentiation

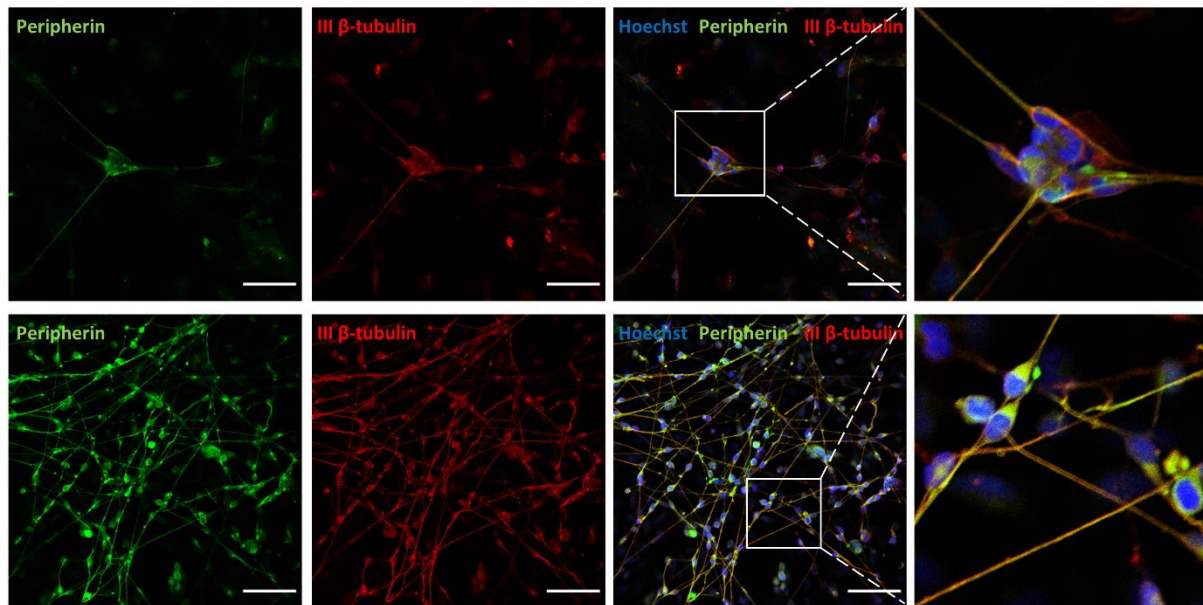

**Figure S2. Characterisation of peripheral neurons generated from iPSC-NCSCs.** Representative immunofluorescence staining of NIBSC8-NCSC-derived peripheral neurons (top row) and NIBSC35-NCSC-derived peripheral neurons (bottom row) with peripherin (green) and III  $\beta$ -tubulin (red). Hoechst staining was used to label the nuclei of the cells (blue). Scale bar = 100 $\mu$ m.

# Dendritic cell differentiation

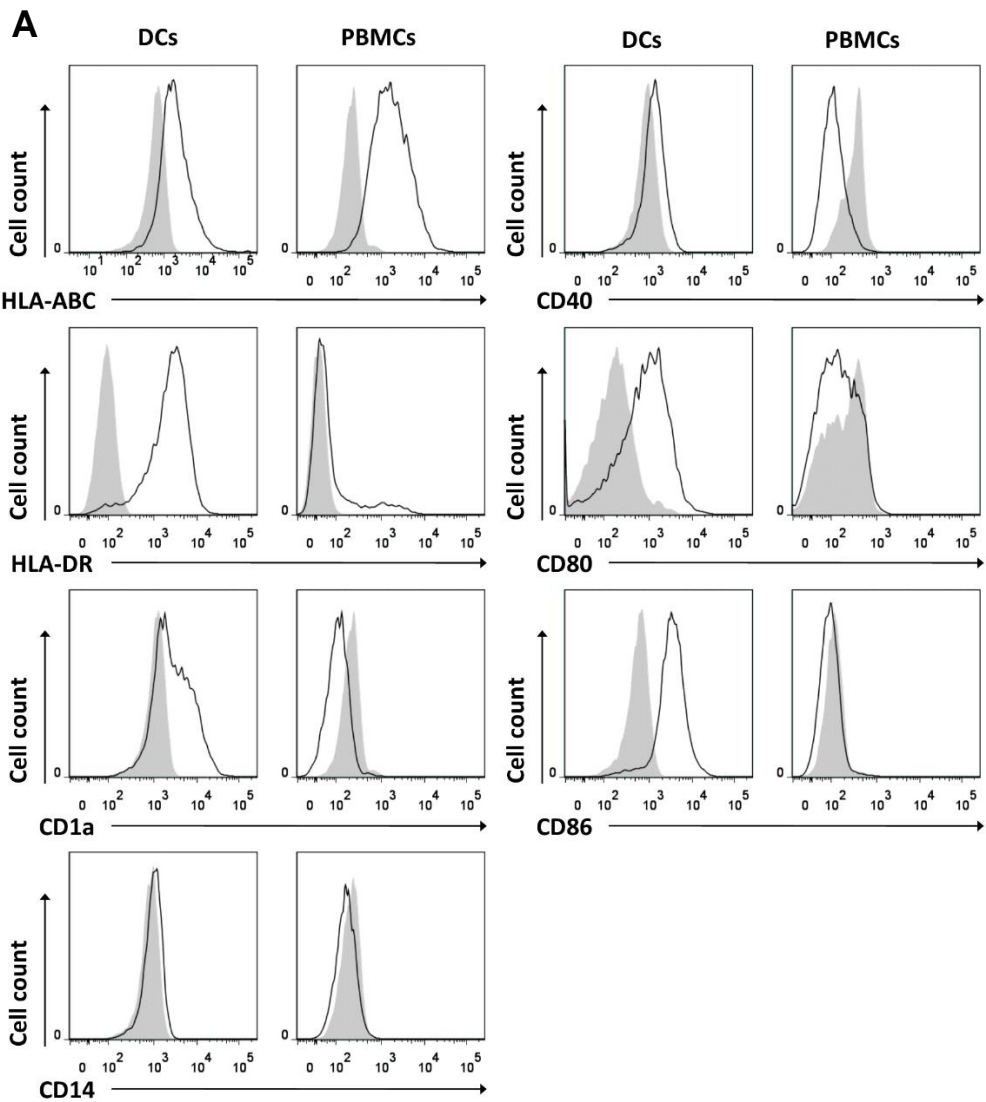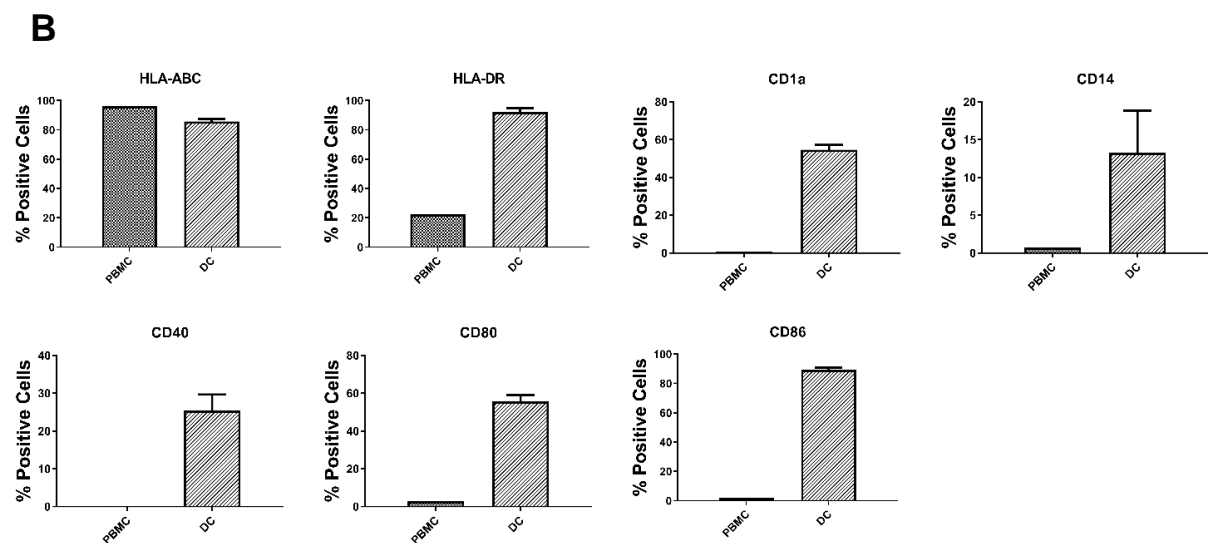

**Figure S3. Dendritic cell generation from monocytes.** (A) Representative histograms of % of cells positive for DC markers, including HLA-ABC, HLA-DR, CD1a, CD14, CD40, CD80 and CD86. Percentages are of total PBMCs and monocyte-derived DCs (black line vs grey shaded isotype control). (B) Graphs of % cells positive for DC markers in PBMCs and DCs. Error bars represent  $\pm$ SEM (n = 3 technical replicates for DCs and n=1 technical replicate for PBMCs).

# Smooth muscle cell differentiation

## A Undifferentiated

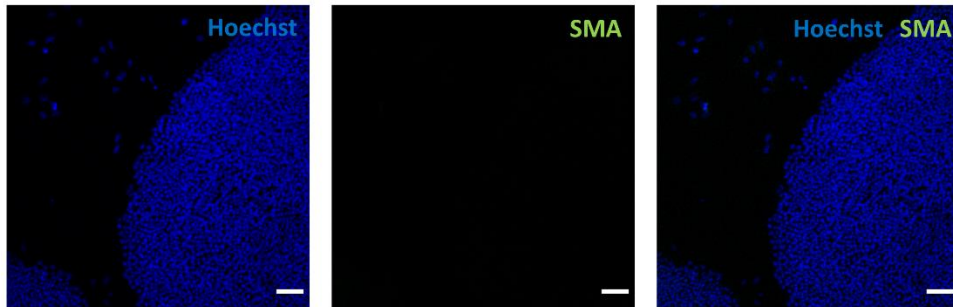

## V-SMCs

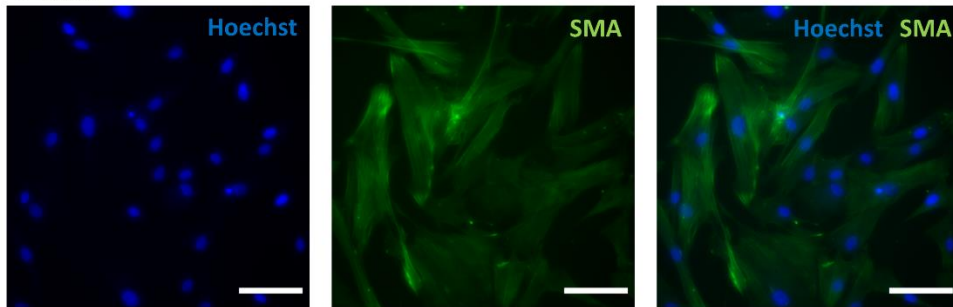

## NIBSC8-SMCs

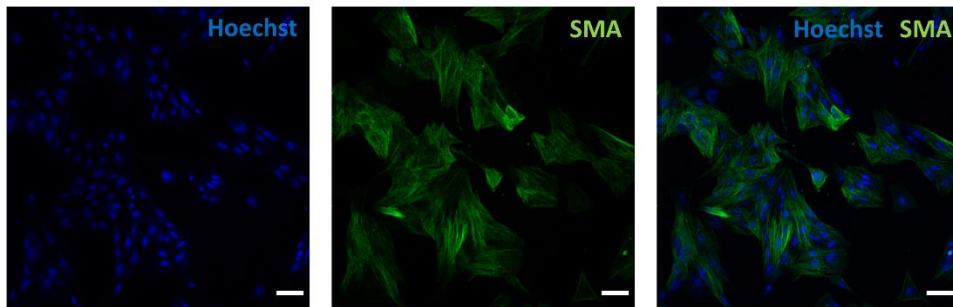

## B

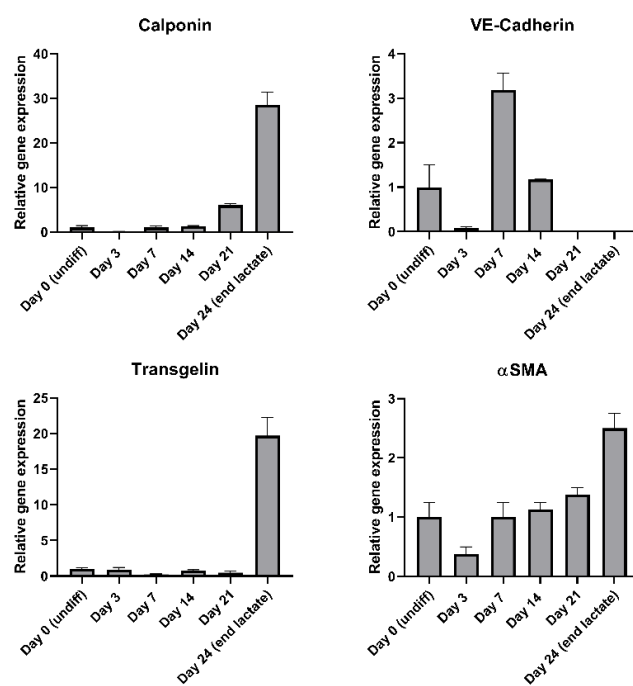

**Figure S4. Characterisation of smooth muscle cells (SMCs) generated from iPSCs.** (A) Representative immunofluorescence staining with smooth muscle actin (SMA, green) and Hoechst staining (blue) for undifferentiated iPSCs (NIBSC8), vessel-derived SMCs (v-SMCs) and NIBSC8-SMCs. Scale bar = 100 $\mu$ m. (B) cDNA was prepared from iPSCs at day 0 (undiff) and iPSC-SMCs at day 4, day 3, day 7, day 14, day 21 and day 24 (end of lactate=end of enrichment phase) of SMC differentiation and qPCR was performed for key SMC markers, including  $\alpha$ SMA, CALPONIN, TRANSGLUTININ and for the endothelial marker VE-CADHERIN. Error bars represent  $\pm$ SEM (n = 2 biological replicates). Results were normalised to GAPDH expressed as fold change gene expression relative to the undifferentiated control.

## Ipsc generation

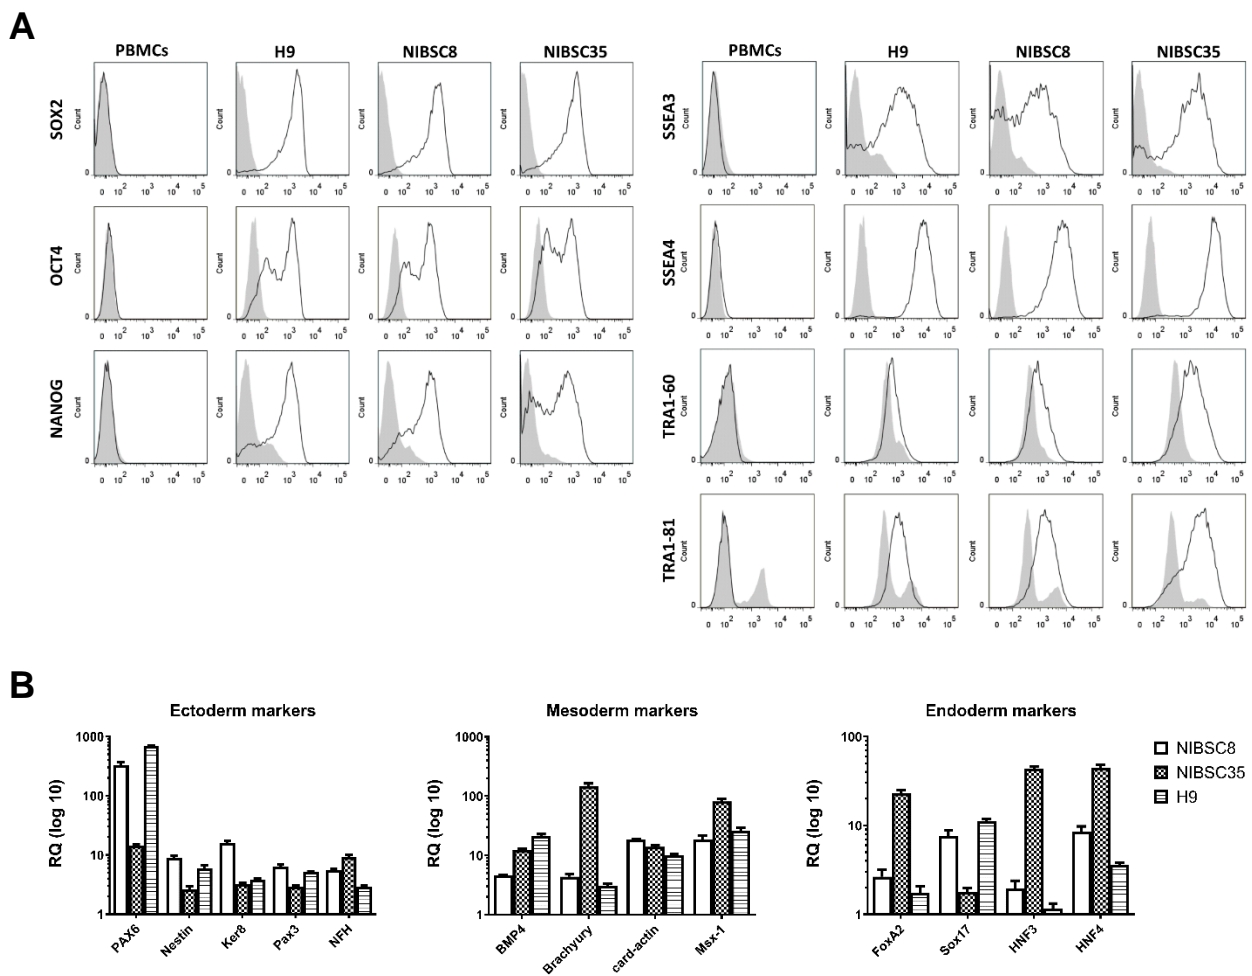

Supplemental tables

| Name                      | HLA-A      | HLA-B      | HLA- DRB1  |
|---------------------------|------------|------------|------------|
| <b><u>IPSC lines:</u></b> |            |            |            |
| NIBSC8                    | *03<br>*23 | *15<br>*44 | *07<br>*13 |
| NIBSC35                   | *02<br>*24 | *08        | *04<br>*15 |
| <b><u>PBMCs:</u></b>      |            |            |            |
| Donor i                   | *26        | *38<br>*35 | *04<br>*04 |
| Donor ii                  | *32<br>*29 | *44<br>*27 | *01<br>*08 |

**Table S1: HLA types of stimulator and responder cell lines.** The number after the asterisk represents an HLA allele (a blank number means that the line is homozygous for that allele). Antigen mismatch for NIBSC8 vs donor i is 6/6, mismatch for NIBSC8 vs donor ii is 5/6, mismatch for NIBSC35 vs donor i is 5/6 and mismatch for NIBSC35 vs donor ii is 6/6.

| Specificity                           | Fluorochromes    | Isotype     | Clone    | Staining dilution | Manufacturer, catalogue number |
|---------------------------------------|------------------|-------------|----------|-------------------|--------------------------------|
| <b><u>Surface markers:</u></b>        |                  |             |          |                   |                                |
| CD271/p75                             | PE               | mouse IgG1  | C40-1457 | 1:20              | BD, 557196                     |
| HNK-1                                 | APC              | mouse IgG2a | NK-1     | 1:10              | BD, 560845                     |
| CD3                                   | Pacific Blue™    | mouse IgG1  | UCHT1    | 1:50              | BD, 558117                     |
| CD4                                   | APC-Cy™7         | mouse IgG1  | RPA-T4   | 1:50              | BD, 557871                     |
| CD8                                   | PerCP-Cy™5.5     | mouse IgG1  | RPA-T8   | 1:50              | BD, 560662                     |
| HLA-ABC                               | PE               | mouse IgG1  | G46-2.6  | 1:25              | BD, 560964                     |
| HLA-DR                                | APC              | mouse IgG2a | L243     | 1:50              | BioLegend, 307610              |
| HLA-DR, DP, DQ                        | Alexa Fluor® 647 | mouse IgG2a | Tu39     | 1:50              | BD, 563591                     |
| CD40                                  | V450             | mouse IgG1  | 5C3      | 1:50              | BD, 561219                     |
| CD80                                  | PE-Cy™7          | mouse IgG1  | L307.4   | 1:50              | BD, 561135                     |
| CD86                                  | PerCP-Cy™5.5     | mouse IgG1  | 2331     | 1:50              | BD, 561129                     |
| CD1a                                  | PE               | mouse IgG1  | HI149    | 1:10              | BD, 555807                     |
| CD14                                  | FITC             | mouse IgG2a | M5E2     | 1:10              | BD, 555397                     |
| SSEA3                                 | Alexa Fluor® 647 | rat IgM     | MC-631   | 1:33              | BD, 561145                     |
| SSEA4                                 | PerCP-Cy™5.5     | mouse IgG3  | MC813-70 | 1:20              | BD, 561565                     |
| TRA1-60                               | PE               | mouse IgM   | TRA-1-60 | 1:12.5            | BD, 560884                     |
| TRA1-81                               | FITC             | mouse IgM   | TRA-1-81 | 1:5               | BD, 560194                     |
| <b><u>Human MSC Analysis Kit:</u></b> |                  |             |          |                   | BD, 562245                     |
| CD90                                  | FITC             | mouse IgG1  | 5E10     | 1:20              | n/a                            |
| CD105                                 | PerCP-Cy™5.5     | mouse IgG1  | 266      | 1:20              | n/a                            |
| CD73                                  | APC              | mouse IgG1  | AD2      | 1:20              | n/a                            |
| CD44                                  | PE               | mouse IgG2b | G44-26   | 1:20              | n/a                            |
| CD34                                  | PE               | mouse IgG1  | 581      | 1:20              | n/a                            |
| CD11b                                 | PE               | mouse IgG1  | ICRF44   | 1:20              | n/a                            |



|                                      |                            |             |          |      |            |
|--------------------------------------|----------------------------|-------------|----------|------|------------|
| CD19                                 | PE                         | mouse IgG1  | HIB19    | 1:20 | n/a        |
| CD45                                 | PE                         | mouse IgG1  | HI30     | 1:20 | n/a        |
| HLA-DR                               | PE                         | mouse IgG2a | G46-6    | 1:20 | n/a        |
| <b><u>Intracellular markers:</u></b> |                            |             |          |      |            |
| Ki-67                                | PE-Cy <sup>TM</sup> 7      | mouse IgG1  | B56      | 1:20 | BD, 561283 |
| SOX2                                 | V450                       | mouse IgG1  | O30-678  | 1:20 | BD, 561610 |
| OCT4                                 | PerCP-Cy <sup>TM</sup> 5.5 | mouse IgG1  | 40/Oct-3 | 1:25 | BD, 560794 |
| NANOG                                | Alexa Fluor® 647           | mouse IgG1  | N31-355  | 1:20 | BD, 561300 |

**Table S2: Antibodies used for flow cytometry.** Summary of all antibodies used throughout this study for flow cytometry analysis.

| No.                                        | Primer       | Primer Sequence                    | Annealing Temperature | PCR Product size |
|--------------------------------------------|--------------|------------------------------------|-----------------------|------------------|
| <b><u>Pluripotency markers:</u></b>        |              |                                    |                       |                  |
| 3.                                         | Oct4-F       | GAC AGG GGG AGG GGA GGA GCT AGG    | 57 (°C)               | 143 bp           |
| 4.                                         | Oct4-R       | CTT CCC TCC AAC CAG TTG CCC CAA AC |                       |                  |
| 5.                                         | Sox2-F       | GGG AAA TGG GAG GGG TGC AAA AGA GG | 57 (°C)               | 151 bp           |
| 6.                                         | Sox2-R       | TTG CGT GAG TGT GGA TGG GAT TGG TG |                       |                  |
| 7.                                         | Nanog-F      | TGC CTC ACA CGG AGA CTG TC         | 58 (°C)               | 65 bp            |
| 8.                                         | Nanog-R      | AGG GCT GTC CTG AAT AAG CA         |                       |                  |
| <b><u>Housekeeping gene:</u></b>           |              |                                    |                       |                  |
| 13.                                        | GAPDH-F      | ACG AAT TTG GCT ACA GCA ACA GGG    | 56 (°C)               | 188 bp           |
| 14.                                        | GAPDH-R      | TCT ACA TGG CAA CTG TGA GGA GG     |                       |                  |
| <b><u>Germ layer-specific markers:</u></b> |              |                                    |                       |                  |
| 13.                                        | PAX3-F       | CGT CTC CAA GAT CCT GTG C          | 56 (°C)               | 91 bp            |
| 14.                                        | PAX3-R       | AGG CGT TGT CAC CTG CTT            |                       |                  |
| 15.                                        | PAX6-F       | CCA GAA AGG ATG CCT CAT AAA GG     | 58 (°C)               | 50 bp            |
| 16.                                        | PAX6-R       | TCT GCG CGC CCC TAG TTA            |                       |                  |
| 17.                                        | KER8-F       | TGA GGT CAA GGC ACA GTA CG         | 60 (°C)               | 161 bp           |
| 18.                                        | KER8-R       | TGA TGT TCC GGT TCA TCT CA         |                       |                  |
| 19.                                        | NFH-F        | TGA ACA CAG ACG CTA TGC GCT CAG    | 58 (°C)               | 400 bp           |
| 20.                                        | NFH-R        | CAC CTT TAT GTG AGT GGA CAC AGA G  |                       |                  |
| 21.                                        | NESTIN-F     | TGC GGG CTA CTG AAA AGT TC         | 58 (°C)               | 63 bp            |
| 22.                                        | NESTIN-R     | TGT AGG CCC TGT TTC TCC TG         |                       |                  |
| 23.                                        | BRACHYURY-F  | TGC TTC CCT GAG ACC CAG TT         | 58 (°C)               | 121 bp           |
| 24.                                        | BRACHYURY-R  | GAT CAC TTC TTT CCT TTG CAT C      |                       |                  |
| 25.                                        | BMP4-F       | CTG CAA CCG TTC AGA GGT C          | 58 (°C)               | 91 bp            |
| 26.                                        | BMP4-R       | TGC TCG GGA TGG CAC TAC            |                       |                  |
| 27.                                        | Card-actin F | TCT ATG AGG GCT ACG CTT TG         | 50 (°C)               | 630 bp           |
| 28.                                        | Card-actin R | CCT GAC TGG AAG GTA GAT GG         |                       |                  |
| 29.                                        | MSX-1-F      | CCT TCC CTT TAA CCC TCA CAC        | 62 (°C)               | 287 bp           |
| 30.                                        | MSX-1-R      | CCG ATT TCT CTG CGC TTT TC         |                       |                  |

|                             |               |                               |         |        |
|-----------------------------|---------------|-------------------------------|---------|--------|
| 31.                         | HNF3-F        | GAC AAG TGA GAG AGC AAG TG    | 56 (°C) | 237 bp |
| 32.                         | HNF3-R        | ACA GTA GTG GAA ACC GGA G     |         |        |
| 33.                         | HNF4-F        | TCT CAT GTT GAA GCC ACT GC    | 51 (°C) | 501 bp |
| 34.                         | HNF4-R        | GGT TTG TTT CTC GGG TTG A     |         |        |
| 35.                         | SOX17-F       | ACG CCG AGT TGA GCA AGA       | 58 (°C) | 82 bp  |
| 36.                         | SOX17-R       | TCT GCC TCC TCC ACG AAG       |         |        |
| 37.                         | FOXA2-F       | GGG AGC GGT GAA GAT GGA       | 58 (°C) | 92 bp  |
| 38.                         | FOXA2-R       | TCA TGT TGC TCA CGG AGG AGT   |         |        |
| <b><i>NCSC markers:</i></b> |               |                               |         |        |
| 39.                         | AP2-F         | AAC ATG CTC CTG GCT ACA AAA   | 56 (°C) | 71 bp  |
| 40.                         | AP2-R         | AGG GGA GAT CGG TCC TGA       |         |        |
| 41.                         | SOX9-F        | GTA CCC GCA CTT GCA CAA C     | 56 (°C) | 74 bp  |
| 42.                         | SOX9-R        | TCT CGC TCT CGT TCA GAA GTC   |         |        |
| 43.                         | p75-F         | TCA TCC CTG TCT ATT GCT CCA   | 56 (°C) | 99 bp  |
| 44.                         | p75-R         | TGT TCT GCT TGC AGC TGT TC    |         |        |
| <b><i>SMC markers:</i></b>  |               |                               |         |        |
| 45.                         | VE-CADHERIN-F | GAA ACA GAG CCC AGG TCA TTA   | 59 (°C) | 773 bp |
| 46.                         | VE-CADHERIN-R | GAT GGT GAG GAT GCA GAG TAA G |         |        |
| 47.                         | αSMA-F        | GAT CTG GCA CCA CTC TTT CTA C | 59 (°C) | 486 bp |
| 48.                         | αSMA-R        | CAG GCA ACT CGT AAC TCT TCT C |         |        |
| 49.                         | CALPONIN-F    | ATG TCC TCT GCT CAC TTC AAC   | 59 (°C) | 420 bp |
| 50.                         | CALPONIN-R    | CAC GTT CAC CTT GTT TCC TTT C |         |        |
| 51.                         | TRANSGELIN-F  | GAA GAA AGC CCA GGA GCA TAA   | 59 (°C) | 410 bp |
| 52.                         | TRANSGELIN-R  | CCA GGA TGA GAG GAA CAG TAG A |         |        |

**Table S3: Primers for qPCR analysis.** Summary of all qPCR primers used throughout this study. All primers were purchased from IDT®, Integrated DNA Technologies.

| Specificity                                   | Immunised animal | Clone        | Staining dilution | Manufacturer, catalogue number |
|-----------------------------------------------|------------------|--------------|-------------------|--------------------------------|
| <b><i>Primary antibody:</i></b>               |                  |              |                   |                                |
| Anti-α smooth muscle Actin (Alexa Fluor® 488) | Mouse            | 1A4          | 1:100             | Abcam, ab184675                |
| Anti-Peripherin                               | Rabbit           | (Polyclonal) | 1:50              | MilliporeSigma, AB1530         |
| Anti-β-Tubulin Isotype III                    | Mouse            | SDL.3D10     | 1:50              | MilliporeSigma, T5076          |
| <b><i>Secondary antibody:</i></b>             |                  |              |                   |                                |
| FITC Anti-rabbit                              | Goat             | IgG          | 1:200             | Abcam, ab97050                 |
| Alexa Fluor 647 Anti-mouse                    | Goat             | IgG          | 1:200             | Abcam, ab150115                |

**Table S4: Antibodies used for ICC.** Summary of all antibodies used throughout this study for ICC analysis.
